# Supplementary material for: Evolution of seed characters and of dispersal modes in Aizoaceae
Source: Frontiers journal article supplement (doi:10.3389/fpls.2023.1140069), 2023-03-22
Supplement: Data_Sheet_1.zip [file Supplementary file 2.xlsx]

## Sheet: Лист1
Evolution of seed characters and of dispersal modes in Aizoaceae. Alexander P. Sukhorukov*, Maya V. Nilova, Yuri Mazei, Maria Kushunina, Cornelia Klak * Correspondence: Corresponding author: suchor@mail.ru
Supplementary file 2. List of species and coding of the carpological characters.
						Character number:	1	2	3	4	5	6		7	8	9	10	11	12	13	14	15	16			17	18
Species	Subfamily	Tribe	Annual/perennial	Vegetation prone to fire (fynbos and renosterveld)/not fireprone vegetation (karroid vegetation)	Predominant dispersal mode: 0 - hydrochory ; 1 - anemochory; 2 - autochory; 3 - zoochory	Fruit hygrochasy: 0 - absent; 1 - present (rapid response to soaking; fruit parts recurved after soaking); 2 - present, but fruit parts not recurved	Number of seeds in each fruit: 0 - three or more in a capsule, 1 - one (fruit indehiscent), 2 - pending seed number (1-2); 3 - two seeds in a capsule; 4 - fruit breaking into mericarps containing 1-2 seeds	Fruit mericarps: 0 - absent; 1 - present (consisting og 1-2 seeds in each mericarp)	Seed aril: 0 - absent, 1 - present	Seed color: 0 - yellow-brown, 1 - brown, 2 - red, 3 - black or reddish-black, 4 - bicoloured (rose and white)	Seed shape: 0 - ovate, 1 - depressed roundish, 2 - kidney-shaped (reniform), 3 - D-shaped; 4 - pear-shaped, 5 - sphaerical (in outgroups)	Seed size (mm), non-coded	Seed size (coded): 0 - very small (0.3-0.7 mm); 1 - small (0.8-1.1 mm); 2 - medium-sized (1.2-1.7 mm); 3- large (from 1.8 mm)	Seed keel: 0 - absent, 1 - present	Seed notch: 0 - not present or small, 1 - well-visible reaching 1/3-1/2 of the seed diameter	Longitudinal ridges on the seed: 0 - absent, 1 - present on the seed surface, 2 - present in seed margin along the cotyledon	Surface ultrasculpture of the seed: 0 - smooth, 1 - rugose, 2 - colliculate (at least in some seed parts), 3 - mamillate, 4 - cristate; 5 - finger-like	Puzzle-like borders of cells: 0 - absent or not seen, 1 - present	Surface of testa cells: 0 – not foveolate; 1 – foveolate (with small pits)	Waxes: 0 - absent or obscure, 1 - present	Shape of wax deposits: 0 - flakes; 1 - finger-like, 2 - crystals, 3 - not applicable due to absence of waxes	Perisperm: 0 - absent, 1 - present	Embryo shape: 0 - annular, 1 - straight to r-shaped, 2 - bent	Minimum thickness of the seed coat (µm)	Maximum thickness of seed-coat testa (µm; if colliculae or finger-like outgrowths are present)	Thickness of the seed-coat testa: 0 - very thin (up to 20 mkm), 1 - medium (20-40 mkm), 2 - thick (more than 40 mkm)	Seed-coat testa: 0, without stalactites; 1, with dark stalactites	Taxa that have white fortifications in outer cell walls (stalactite-like substances)
Acrodon parvifolius	Ruschioideae	Ruschieae	perennial	fireprone	0	1	0	0	0	1	4	1.0-1.1	1	0	1	0	2	1	0	1	1	1	1	20-25	120	1	0
Acrosanthes anceps	Acrosanthoideae	n.a.	perennial	fireprone	2	0	2	0	0	3	1	2.1-2.3	3	0	0	1	2	0	1	0	3	1	0	40-65	200	2	0
Acrosanthes humifusa	Acrosanthoideae	n.a.	perennial	fireprone	2	0	2	0	0	3	1	2.0	3	0	0	1	2	0	0	0	3	1	0	45-60	200	2	0
Aizoanthemopsis hispanica	Aizooideae	n.a.	annual	non-fireprone	0	1	0	0	0	3	3	0.6	0	0	0	1	2	0	1	1	0	1	2	25-30	50	1	1
Aizoanthemum dinteri	Aizooideae	n.a.	annual	non-fireprone	0	1	0	0	0	3	2	0.6	0	0	0	1	2	0	1	0	3	1	2	25-30	40	1	1
Aizoanthemum mossamedense	Aizooideae	n.a.	annual	non-fireprone	0	1	0	0	0	3	2	0.6-0.7	0	0	0	1	2	0	1	0	3	1	2	15	50	0	1
Aizoon canariense	Aizooideae	n.a.	annual	non-fireprone	0/2	2	0	0	0	3	2	0.7-0.8	0	0	0	1	2	0	1	0	3	1	2	15-20	40	0	1
Aizoon fruticosum+ (=Galenia fruticosa)	Aizooideae	n.a.	perennial	non-fireprone	2	0	1	0	0	3	4	1.2-1.3	2	0	0	1	2	0	0	0	3	1	2	15-20	40	0	1
Aizoon glinoides	Aizooideae	n.a.	perennial	non-fireprone	0/2	2	0	0	0	3	2	1.1	1	0	0	1	2	0	0	0	3	1	2	15-20	75	0	1
Aizoon paniculatum	Aizooideae	n.a.	perennial	non-fireprone	2	0	0	0	0	3	2	1.3	2	0	0	1	3	0	1	0	3	1	2	35-45	55	1	1
Aizoon pubescens + (=Galenia pubescens)	Aizooideae	n.a.	perennial	non-fireprone	2	0	0	0	0	3	2	1.0	1	0	0	1	2	0	0	0	3	1	2	25-30	40	1	1
Aizoon rigidum	Aizooideae	n.a.	perennial	non-fireprone	2	0	0	0	0	3	2	1.0	1	0	0	1	2	0	0	0	3	1	2	50-65	80	2	1
Aizoon secundum (=Galenia secunda)	Aizooideae	n.a.	perennial	non-fireprone	2	0	0	0	0	3	2	1.0	1	0	0	1	2	0	0	0	3	1	2	20-25	40	1	1
Aizoon sericeum	Aizooideae	n.a.	perennial	non-fireprone	2	0	2	0	0	3	2	1.0	1	0	0	1	3	0	1	0	3	1	2	18-20	30	0	1
Aizoon virgatum	Aizooideae	n.a.	perennial	non-fireprone	2	0	0	0	0	3	2	1.0	1	0	0	1	2	0	1	0	3	1	2	20-25	n/a	0	1
Anisostigma schenckii	Sesuvioideae	Anisostigmateae	perennial	non-fireprone	1	0	1	0	0	1	0	4.5-6.0	3	0	0	0	0	0	0	0	3	0	2	15-20	n/a	0	0
Antimima hantamensis	Ruschioideae	Ruschieae	perennial	non-fireprone	0	1	0	0	0	0	4	1.1-1.2	1	0	0	0	3	1	0	1	0	1	1	12-20	25	0	0	white fortifications present
Antimima solida	Ruschioideae	Ruschieae	perennial	non-fireprone	0	1	0	0	0	0	4	0.9-1.0	1	0	0	0	1	0	0	1	0	1	1	12-15	20	0	0
Antimima ventricosa	Ruschioideae	Ruschieae	perennial	non-fireprone	0	1	0	0	0	0	4	1.5-1.8	2	0	0	0	0	0	0	1	0	1	1	20-25	30	1	0
Apatesia helianthoides	Ruschioideae	Apatesieae	annual	fireprone	0/1	1	4	1	0	1	1	1.0-1.1	1	0	0	0	3	1	0	1	0	1	0	20-25	n/a	1	1
Argyroderma delaetii	Ruschioideae	Ruschieae	perennial	non-fireprone	0	1	0	0	0	0	4	0.5-0.7	0	0	0	0	0	0	0	0	3	1	1	5-10	n/a	0	0
Astridia longifolia	Ruschioideae	Ruschieae	perennial	non-fireprone	0	1	0	0	0	1	4	1.4-1.5	2	0	0	0	2	1	0	1	1	1	1	20-25	90	1	0
Braunsia geminata	Ruschioideae	Ruschieae	perennial	non-fireprone	0	1	0	0	0	1	4	1.0	1	0	0	0	5	?	0	1	1	1	1	30-45	500	1	0
Carpanthea pomeridiana	Ruschioideae	Apatesieae	annual	fireprone	0	1	0	0	0	3	3	1.3-1.4	2	1	0	0	3	1	0	1	0	1	0	18-25	40	1	0	white fortifications present
Carpobrotus acinaciformis	Ruschioideae	Ruschieae	perennial	fireprone	3	0	0	0	0	2	0	1.4-1.5	2	0	0	0	0	0	0	0	3	1	2	20-30	n/a	1	1
Carpobrotus edulis	Ruschioideae	Ruschieae	perennial	fireprone	3	0	0	0	0	2	0	1.2-1.3	2	0	0	0	0	1	0	0	3	1	1	20-30	n/a	1	1
Cheiridopsis peculiaris	Ruschioideae	Ruschieae	perennial	non-fireprone	0	1	0	0	0	1	4	0.9	1	0	0	0	3	0	0	1	0	1	1	15-20	30	0	0	white fortifications present
Circandra serrata	Ruschioideae	Ruschieae	perennial	fireprone	0	1	0	0	0	1	3	0.8	1	0	1	0	2	1	0	1	0	1	2	30-45	70	1	0	annular
Cleretum bellidiforme	Ruschioideae	Dorotheantheae	annual	non-fireprone	0	1	0	0	0	0	3	0.8-1.0	1	0	1	0	3	0	0	1	0	1	1	7-15	n/a	0	0	white fortifications present
Cleretum booysenii	Ruschioideae	Dorotheantheae	annual	non-fireprone	0	1	0	0	0	1	3	0.8-1.0	1	0	1	0	2	0	0	1	0	1	2	25-30	50	1	0	white fortifications present
Cleretum bruynsii	Ruschioideae	Dorotheantheae	annual	non-fireprone	0	1	0	0	0	1	3	1.0-1.1	1	0	1	0	2	0	0	1	0	1	1	12-15	25	0	0
Cleretum herrei	Ruschioideae	Dorotheantheae	annual	fireprone	0	1	0	0	0	3	1	1.4-1.5	2	0	1	0	2	0	0	1	1	1	2	40-50	80	2	0	white fortifications present
Cleretum lyratifolium	Ruschioideae	Dorotheantheae	annual	fireprone	0	1	0	0	0	1	3	1.0	1	0	1	0	3	0	0	1	0	1	2	25-30	75	1	0	white fortifications present
Cleretum paterson-jonesii	Ruschioideae	Dorotheantheae	annual	fireprone	0	1	0	0	0	1	3	0.8-1.0	1	0	1	0	2	0	0	1	1	1	2	20-25	40	1	0	white fortifications present
Cleretum pinnatifidum + (=Aethephyllum pinnatifidum)	Ruschioideae	Dorotheantheae	annual	fireprone	0	1	0	0	0	1	3	0.8	1	0	1	0	2	1	0	1	0	1	2	20-25	40	1	0	white fortifications present
Conicosia elongata	Ruschioideae	Apatesieae	perennial	non-fireprone	1	0	4	1	0	1	1	1.3-1.5	2	1	0	0	0	0	0	1	0	1	0	20-30	n/a	1	0
Conophytum maughanii	Ruschioideae	Ruschieae	perennial	non-fireprone	0	1	0	0	0	1	4	0.4-0.5	0	0	0	0	2	1	0	0	3	1	1	5-10	n/a	0	0
Cylindrophyllum hallii	Ruschioideae	Ruschieae	perennial	non-fireprone	0	1	0	0	0	2	3	0.9-1.0	1	0	1	0	2	1	0	1	0	1	2	12-15	45	0	0	white fortifications present
Deilanthe thudichumii	Ruschioideae	Ruschieae	perennial	non-fireprone	0	1	0	0	0	0	4	0.8	1	0	0	0	3	1	0	1	0	1	2	10-20	n/a	0	0
Delosperma bosseranum	Ruschioideae	Ruschieae	perennial	non-fireprone	0	1	0	0	0	1	4	0.5	0	0	0	0	3	1	0	1	0	1	1	12-15	30	0	0
Delosperma sp.	Ruschioideae	Ruschieae	perennial	non-fireprone	0	1	0	0	0	0	4	0.7	0	0	0	0	3	1	0	0	3	1	1	7-12	n/a	0	0	white fortifications present
Disphyma crassifolium	Ruschioideae	Ruschieae	perennial	non-fireprone	0	1	0	0	0	1	4	1.0-1.1	1	0	0	0	2	1	0	1	1	1	1	15-25	50	1	0
Dracophilus delaetianum	Ruschioideae	Ruschieae	perennial	non-fireprone	0	1	0	0	0	1	4	0.7-0.8	0	0	0	0	3	1	0	0	3	1	1 almost straight	7-10	n/a	0	0
Drosanthemum asperulum	Ruschioideae	Drosanthemeae	perennial	fireprone	0	1	0	0	0	2	3	0.9.-1.1	1	0	1	0	2	1	0	0	3	1	0	55-65	75	2	0
Drosanthemum bicolor	Ruschioideae	Drosanthemeae	perennial	non-fireprone	0	1	0	0	0	1	1	0.6-0.7	0	0	1	0	2	1	0	1	1	1	1	10-15	25	0	0	white fortifications present
Drosanthemum dejagerae	Ruschioideae	Drosanthemeae	perennial	non-fireprone	0	1	0	0	0	4	4	0.8-1.0	1	0	0	0	1	1	0	0	3	1	1	5-8	n/a	0	0
Drosanthemum lavisii	Ruschioideae	Drosanthemeae	perennial	non-fireprone	0	1	0	0	0	1	3	0.7	0	0	1	0	3	1	0	1	1	1	1	15-20	30	0	0	white fortifications present
Eberlanzia gravida	Ruschioideae	Ruschieae	perennial	non-fireprone	0	1	0	0	0	0	4	0.6-0.7	0	0	1	0	2	1	0	1	1	1	1	12-20	25	0	0	white fortifications present
Eberlanzia sedoides	Ruschioideae	Ruschieae	perennial	non-fireprone	0	1	0	0	0	1	4	0.6	0	0	0	0	0	0	0	1	0	1	1	8-15	n/a	0	0	white fortifications present
Ebracteola wilmaniae	Ruschioideae	Ruschieae	perennial	non-fireprone	0	1	0	0	0	0	4	0.7-0.9	1	0	0	0	3	0	0	1	0	1	1	12-20	25	0	0
Erepsia anceps	Ruschioideae	Ruschieae	perennial	fireprone	0	1	0	0	0	1	3	1.1-1.2	1	0	1	0	2	1	0	1	0	1	2	25-35	55	1	0	fortifications not coloured, cells coloured
Erepsia dunensis	Ruschioideae	Ruschieae	perennial	fireprone	0	1	0	0	0	3	3	0.9-1.0	1	0	1	0	2	1	0	1	0	1	2	25-30	50	1	1
Esterhuysenia drepanophylla	Ruschioideae	Ruschieae	perennial	fireprone	0	1	0	0	0	1	3	1.0-1.2	1	0	1	0	2	0	0	1	0	1	1	35-45	60	2	0
Gibbaeum album	Ruschioideae	Ruschieae	perennial	non-fireprone	0	1	0	0	0	1	4	0.7	0	0	0	0	1	1	0	0	3	1	1	7-12	n/a	0	0	straight
Glottiphyllum linguiforme	Ruschioideae	Ruschieae	perennial	non-fireprone	0	1	0	0	0	1	4	1.5	2	0	?	0	5	?	?	1	1	1	1	20-25	120	1	0
Gunniopsis calcarea	Aizooideae	n.a.	perennial	non-fireprone	0	1	0	0	0	3	2	1.0-1.1	1	0	0	0	2	1	0	1	1	1	0	25-35	50	1	1
Gunniopsis calva	Aizooideae	n.a.	annual	non-fireprone	0	1	0	0	0	1	4	0.6	0	0	0	2	1	1	0	1	0	1	1	5-10	25	0	0
Gunniopsis papillata	Aizooideae	n.a.	annual	non-fireprone	0	1	0	0	0	1	3	0.9-1.0	1	0	0	0	3	1	0	1	2	1	0	9-10	25	0	0
Gunniopsis quadrifida	Aizooideae	n.a.	perennial	non-fireprone	0	1	0	0	0	3	2	1.2-1.3	2	0	0	2	2	1	0	1	0	1	0	15-25	75	0	1
Hallianthus planus	Ruschioideae	Ruschieae	perennial	non-fireprone	0	1	0	0	0	0	4	1.3-1.5	2	0	1	0	3	1	0	0	3	1	1	8-12	30-50	0	0
Hymenogyne conica	Ruschioideae	Apatesieae	annual	fireprone	1	0	4	1	0	1	2	2.0-2.3	3	0	0	0	3	1	0	0	3	1	0	10-20	30	0	0	annular!
Hymenogyne glabra	Ruschioideae	Apatesieae	annual	fireprone	1	0	4	1	0	1	2	2.5-3.0	3	1	0	0	3	1	0	0	3	1	0	10-20	30	0	0	annular!
Khadia acutipetala	Ruschioideae	Ruschieae	perennial	non-fireprone	0	1	0	0	0	1	3	1.0-1.1	1	0	1	0	2	0	0	1	1	1	2	6-10	40	0	0
Lampranthus aureus	Ruschioideae	Ruschieae	perennial	fireprone	0	1	0	0	0	1	3	1.0	1	0	1	0	3	1	0	1	0	1	1	15-25	n/a	1	0	white fortifications present
Lampranthus explanatus	Ruschioideae	Ruschieae	perennial	fireprone	0	1	0	0	0	1	3	0.8	1	0	1	0	2	1	0	1	1	1	1	15-20	30	0	0	white fortifications present
Lampranthus reptans	Ruschioideae	Ruschieae	perennial	fireprone	0	1	0	0	0	1	3	0.9-1.0	1	0	1	0	2	1	0	1	0	1	2	10-12	25	0	0
Lampranthus watermeyeri	Ruschioideae	Ruschieae	perennial	non-fireprone	0	1	0	0	0	3	3	1.6-1.7	2	0	1	0	2	1	0	1	1	1	2	30-40	100	1	0
Lapidaria margaretae	Ruschioideae	Ruschieae	perennial	non-fireprone	0	1	0	0	0	0	4	0.5-0.7	0	0	0	0	3	0	0	0	3	1	1	6-10	n/a	0	0
Leipoldtia frutescens	Ruschioideae	Ruschieae	perennial	non-fireprone	0	1	0	0	0	0	4	1.0-1.1	1	0	1	0	0	0	0	1	0	1	1	5-10	n/a	0	0
Leipoldtia nevillei	Ruschioideae	Ruschieae	perennial	non-fireprone	0	1	0	0	0	0	4	0.6	0	0	0	0	0	0	0	1	0	1	1	5-10	n/a	0	0
Lithops ruschiorum	Ruschioideae	Ruschieae	perennial	non-fireprone	0	1	0	0	0	0	4	0.6	0	0	0	0	0	1	0	0	3	1	2	5-7	n/a	0	0
Malephora crassa	Ruschioideae	Ruschieae	perennial	non-fireprone	0	1	0	0	0	1	3	1.0	1	0	0	0	2	1	0	1	1	1	1	7-12	25	0	0
Mesembryanthemum aitonis	Mesembryanthemoideae	n.a.	perennial	non-fireprone	0	1	0	0	0	1	3	0.6-0.7	0	0	1	0	3	1	0	1	1	1	2	15-20	25-35	0	0	white fortifications present
Mesembryanthemum barklyi	Mesembryanthemoideae	n.a.	perennial	non-fireprone	0	1	0	0	0	1	3	0.8-0.9	1	0	1	0	2	1	0	1	1	1	2	10-12	75	0	0
Mesembryanthemum clandestinum	Mesembryanthemoideae	n.a.	perennial	non-fireprone	0	1	0	0	0	1	3	0.7	0	0	1	0	3	1	0	1	0	1	2	7-12	n/a	0	0	white fortifications present
Mesembryanthemum cordifolium + (= Aptenia cordifolia)	Mesembryanthemoideae	n.a.	perennial	non-fireprone	0	1	0	0	0	2	3	1.0	1	0	1	0	2	1	0	1	0	1	2	25-35	120	1	0
Mesembryanthemum coriarium+ (= Psilocaulon absimile)	Mesembryanthemoideae	n.a.	perennial	non-fireprone	0	1	0	0	0	1	3	0.8-0.9	1	0	1	0	2	1	0	1	0	1	2	12-15	n/a	0	0	white fortifications present
Mesembryanthemum crystallinum	Mesembryanthemoideae	n.a.	perennial	non-fireprone	0	1	0	0	0	1	3	0.6-0.7	0	0	1	0	3	1	0	1	1	1	2	10-15	n/a	0	0
Mesembryanthemum kuntzei	Mesembryanthemoideae	n.a.	perennial	non-fireprone	0	1	0	0	0	1	3	1.0-1.1	1	0	1	0	2	1	0	0	3	1	2	10-15	n/a	0	0
Mesembryanthemum lignescens (= Phyllobolus lignescens)	Mesembryanthemoideae	n.a.	perennial	non-fireprone	0	1	0	0	0	1	3	1.0-1.2	1	0	1	0	4	1	0	1	0	1	2	10-15	n/a	0	0
Mesembryanthemum nodiflorum	Mesembryanthemoideae	n.a.	annual	non-fireprone	0	1	0	0	0	1	3	0.5-0.7	0	0	1	0	1	1	0	1	0	1	2	10-12	n/a	0	0
Mesembryanthemum nucifer	Mesembryanthemoideae	n.a.	perennial	non-fireprone	2	0	2	0	0	1	4	1.3-1.6	2	0	0	0	0	1	0	0	3	1	1	10-12	n/a	0	0
Mesembryanthemum rabiei	Mesembryanthemoideae	n.a.	perennial	non-fireprone	0	1	0	0	0	1	3	1.3-1.5	2	0	1	0	5	0	1	1	0	1	2	25-30	140	1	0
Mesembryanthemum splendens subsp. splendens	Mesembryanthemoideae	n.a.	perennial	non-fireprone	0	1	0	0	0	1	2	1.5-1.6	2	0	1	0	2	1	0	1	1	1	2	25-30	260	1	0
Mesembryanthemum tetragonum + (= Prenia tetragona)	Mesembryanthemoideae	n.a.	perennial	non-fireprone	0	1	0	0	0	1	3	1.4-1.5	2	0	1	0	4	1	0	1	1	1	2	12-20	200	0	0
Mestoklema arboriforme+ (= Ruschia arboriforme)	Ruschioideae	Ruschieae	perennial	non-fireprone	0	1	0	0	0	0	4	0.5-0.6	0	0	0	0	3	1	0	1	0	1	1	7-10	n/a	0	0
Mitrophyllum dissitum	Ruschioideae	Ruschieae	perennial	non-fireprone	0	1	0	0	0	0	4	0.7	0	0	0	0	3	1	0	1	0	1	1	15-20	50	0	0
Namaquanthus vanheerdei	Ruschioideae	Ruschieae	perennial	non-fireprone	0	1	0	0	0	1	3	1.5-1.8	2	0	1	0	5	0	0	1	1	1	1	15-20	260	0	0
Namibia ponderosa	Ruschioideae	Ruschieae	perennial	non-fireprone	0	1	0	0	0	0	4	0.6	0	0	0	0	1	1	0	1	0	1	1	8-15	25	0	0
Oscularia deltoides	Ruschioideae	Ruschieae	perennial	non-fireprone	0	1	0	0	0	1	3	0.8-1.0	1	0	1	0	3	1	0	1	1	1	2	20-30	n/a	1	0	white fortifications present
Peersia vanheerdei	Ruschioideae	Ruschieae	perennial	non-fireprone	0	1	0	0	0	0	4	0.6-0.8	0	0	1	0	3	1	0	0	3	1	1	7-12	25	0	0
Pleiospilos compactus ssp canus+	Ruschioideae	Ruschieae	perennial	non-fireprone	0	1	0	0	0	1	3	1.0-1.1	1	0	0	0	3	1	0	1	0	1	1	20-25	70	1	0
Ruschia caroli	Ruschioideae	Ruschieae	perennial	non-fireprone	0	2	0	0	0	3	3	1.0-1.2	1	0	0	0	2	1	0	1	0	1	1	15-25	35	1	0	white fortifications present
Ruschia costata	Ruschioideae	Ruschieae	perennial	non-fireprone	0	1	0	0	0	1	3	1.2	2	0	1	0	3	1	0	0	3	0	1	25-30	40	1	0	white fortifications present
Ruschia dejagerae	Ruschioideae	Ruschieae	perennial	non-fireprone	0	1	0	0	0	1	3	0.8	1	0	1	0	2	1	0	1	1	1	1 almost straight	25-30	50	1	0	white fortifications present
Ruschia dichroa	Ruschioideae	Ruschieae	perennial	non-fireprone	0	1	0	0	0	3	3	1.2	2	0	1	0	2	1	0	1	0	1	1	20-25	40	1	0	white fortifications present
Ruschia grisea	Ruschioideae	Ruschieae	perennial	non-fireprone	0	1	0	0	0	0	3	0.8-0.9	1	0	0	0	3	1	0	0	3	1	1	10-15	25	0	0	white fortifications present
Ruschia lineolata	Ruschioideae	Ruschieae	perennial	non-fireprone	0	1	0	0	0	1	3	0.8-1.0	1	0	0	0	3	1	0	1	3	1	1	25-35	50	1	0
Ruschia multiflora	Ruschioideae	Ruschieae	perennial	non-fireprone	0	1	0	0	0	1	1	1.0	1	0	1	0	2	1	0	1	0	1	1	5-60	100	2	0	white fortifications present
Ruschia rupicola	Ruschioideae	Ruschieae	perennial	non-fireprone	0	1	0	0	0	0	3	0.8	1	0	1	0	3	1	0	0	3	1	1	10-15	n/a	0	0	white fortifications present
Ruschia spinosa	Ruschioideae	Ruschieae	perennial	non-fireprone	0	1	0	0	0	0	3	0.6	0	0	0	0	0	0	0	0	3	1	1	5-8	n/a	0	0
Ruschia tenella	Ruschioideae	Ruschieae	perennial	non-fireprone	0	1	0	0	0	2	1	0.7-0.9	1	0	1	0	3	0	0	1	0	1	1	20-25	40	1	0
Ruschiella lunulata	Ruschioideae	Ruschieae	perennial	non-fireprone	0	1	0	0	0	0	3	0.8-1.0	1	0	0	0	3	1	0	1	0	1	1	8-12	25	0	0	white fortifications present
Scopelogena bruynsii	Ruschioideae	Ruschieae	perennial	non-fireprone	0	1	0	0	0	1	3	0.9-1.0	1	0	1	0	2	0	0	1	1	1	2	10-20	40	0	0
Sesuvium curassavicum	Sesuvioideae	Sesuvieae	annual	non-fireprone	2	0	0	0	1	3	2	0.8-0.9	1	0	0	0	1	0	0	0	3	1	0	30-45	55	1	0
Sesuvium humifusum	Sesuvioideae	Sesuvieae	annual	non-fireprone	2	0	0	0	1	2	2	0.3-0.4	0	0	0	0	0	0	0	0	3	1	2	10-12	n/a	0	0
Sesuvium maritimum	Sesuvioideae	Sesuvieae	annual	non-fireprone	2	0	0	0	1	3	2	0.8-1.0	1	0	0	0	0	0	0	0	3	1	0	25-30	n/a	1	0
Sesuvium mezianum	Sesuvioideae	Sesuvieae	perennial	non-fireprone	2	0	0	0	1	2	2	0.4	0	0	0	0	1	0	0	0	3	1	2	10-15	n/a	0	0
Sesuvium portulacastrum	Sesuvioideae	Sesuvieae	perennial	non-fireprone	2	0	0	0	1	3	2	1.0-1.2	1	0	0	0	0	0	0	0	3	1	0	35-45	n/a	1	0
Sesuvium revolutifolium (=S. verrucosum)	Sesuvioideae	Sesuvieae	perennial	non-fireprone	2	0	0	0	1	3	2	0.8-1.0	1	0	0	0	0	0	0	0	3	1	0	25-35	n/a	1	0
Sesuvium rubriflorum	Sesuvioideae	Sesuvieae	annual	non-fireprone	2	0	0	0	1	2	2	0.3-0.4	0	0	0	0	0	0	0	0	3	1	2	10-20	n/a	0	0
Skiatophytum skiatophytoides	Ruschioideae	Apatesieae	perennial	fireprone	2	0	4	1	0	3	2	2.5-2.9	3	0	1	0	3	0	0	0	3	1	1	50-60	75	2	0
Skiatophytum tripolium	Ruschioideae	Apatesieae	perennial	fireprone	2	0	3	0	0	3	3	1.6-1.7	2	0	1	0	3	1	0	0	3	1	1	70-80	130	2	0
Smicrostigma viride	Ruschioideae	Ruschieae	perennial	fireprone	0	1	0	0	0	1	3	0.5	0	0	0	0	3	1	0	1	1	1	1	12-20	35	0	0	white fortifications present
Stayneria neilii	Ruschioideae	Ruschieae	perennial	fireprone	0	1	0	0	0	1	0	0.9-1.0	1	0	1	0	3	0	0	1	1	1	1	25-30	50	1	0	white fortifications present
Stoeberia carpii	Ruschioideae	Ruschieae	perennial	non-fireprone	0	1	0	0	0	0	3	0.7-0.8	0	0	1	0	2	0	0	1	0	1	1	8-12	50	0	0
Tetragonia echinata	Aizooideae	n.a.	annual	non-fireprone	3	0	0	0	0	0	4	2.0-2.2	3	0	0	0	0	0	0	0	3	1	0	5-8	n/a	0	0
Tetragonia saligna	Aizooideae	n.a.	perennial	non-fireprone	2	0	1	0	0	0	4	0.8-1.0	1	0	0	0	0	0	0	0	3	1	0	5-8	n/a	0	0
Tetragonia spicata	Aizooideae	n.a.	perennial	non-fireprone	1	0	3	0	0	0	4	3.0	3	0	0	0	0	0	0	0	3	1	0	5-8	n/a	0	0
Tetragonia tetragonoides	Aizooideae	n.a.	perennial	non-fireprone	0/2	0	3	0	0	0	4	3.0	3	0	0	0	0	0	0	0	3	1	0	5-8	n/a	0	0
Trianthema crystallinum	Sesuvioideae	Sesuvieae	perennial	non-fireprone	2	0	2	0	1	3	1	0.9-1.0	1	0	0	1	n/a	0	0	0	3	1	2	30-40	50	1	0
Trianthema hereroense	Sesuvioideae	Sesuvieae	perennial	non-fireprone	2	0	2	0	1	2	1	1.3	2	1	0	0	n/a	0	0	0	3	1	0	12-20	n/a	0	1
Trianthema monogynum	Sesuvioideae	Sesuvieae	annual	non-fireprone	2	0	3	0	1	3	2	1.3-1.5	2	0	0	1	n/a	0	0	0	3	1	0	35-45	100	2	1
Trianthema portulacastrum	Sesuvioideae	Sesuvieae	annual	non-fireprone	2	0	3	0	1	3	1	1.5	2	0	0	1	n/a	0	0	0	3	1	0	35-50	170	2	0
Trianthema sanguineum	Sesuvioideae	Sesuvieae	annual	non-fireprone	2	0	3	0	1	3	1	1.0-1.1	1	0	0	1	n/a	0	0	0	3	1	0	30-40	50	1	0
Trianthema triquetrum	Sesuvioideae	Sesuvieae	perennial	non-fireprone	2	0	3	0	1	3	1	1.0-1.1	1	1	0	1	n/a	0	0	0	3	1	0	30-35	n/a	1	0
Tribulocarpus dimorphanthus	Sesuvioideae	Anisostigmateae	perennial	non-fireprone	3	0	0	0	0	0	0	5.0	3	0	0	0	0	0	0	0	3	1	0	7-10	n/a	0	0
Tribulocarpus somalensis	Sesuvioideae	Anisostigmateae	perennial	non-fireprone	3	0	0	0	0	0	0	4.0	3	0	0	0	0	0	0	0	3	1	0	6-10	n/a	0	0
Vanheerdea roodiae	Ruschioideae	Ruschieae	perennial	non-fireprone	0	1	0	0	0	0	4	0.6	0	0	0	0	1	0	0	0	3	1	2	5-8	n/a	0	0
Vanzijlia annulata	Ruschioideae	Ruschieae	perennial	non-fireprone	0	1	0	0	0	0	4	0.7-0.8	0	0	0	0	3	1	0	0	3	1	1	5-8	20	0	0
Zaleya govindia	Sesuvioideae	Sesuvieae	perennial	non-fireprone	2	0	3	0	1	3	1	1.5-1.6	2	0	0	0	n/a	0	0	0	3	1	0	60-80	100	0	0
Zaleya pentandra	Sesuvioideae	Sesuvieae	perennial	non-fireprone	2	0	3	0	1	3	1	1.3	2	0	0	0	n/a	0	0	0	3	1	0	60-75	100	0	0
outgroups
Gisekia africana (Gisekiaceae)			annual	non-fireprone	2	0	2	1	0	3	0	1.1	1	0	0	0	1	0	0	0	3	1	0	37-40	n/a	1	1
Glinus oppositifolius (Molluginaceae)			annual	non-fireprone	3	1	0	0	1	2	2	0.3-0.5	0	0	0	0	2	0	0	0	3	1	2	12	n/a	0	1
Mollugo verticillata (Molluginaceae)			annual	non-fireprone	2	0	0	0	0	2	2	0.5-0.7	0	0	0	1	0	0	0	0	3	1	0	15	n/a	0	1
Kewa salsoloides (Kewaceae)			perennial	non-fireprone	2	0	0	0	1	3	2	0.5-0.7	0	0	0	0	0	0	0	0	3	1	1	15-17	n/a	0	1
Limeum obovatum (= ex-Limeum indicum)			annual	non-fireprone	2	0	2	1	0	0	0	2.0	3	0	0	0	0	0	0	0	3	1	0	8	n/a	0	0
Lophiocarpus tenuissimus (Lophiocarpaceae)			annual	non-fireprone	1	0	1	0	0	3	5	0.5	0	0	0	0	0	0	0	0	3	1	0	50	n/a	2	1
	Subfamily	Tribe	Annual/perennial	Vegetation prone to fire (fynbos and renosterveld)/not fireprone vegetation (karroid vegetation)	Predominant dispersal mode: 0 - hydrochory ; 1 - anemochory; 2 - autochory; 3 - zoochory	Fruit hygrochasy: 0 - absent; 1 - present (rapid response to soaking; fruit parts recurved after soaking); 2 - present, but fruit parts not recurved	Number of seeds in each fruit: 0 - three or more in a capsule, 1 - one (fruit indehiscent), 2 - pending seed number (1-2); 3 - two seeds in a capsule; 4 - fruit breaking into mericarps containing 1-2 seeds	Fruit mericarps: 0 - absent; 1 - present (consisting og 1-2 seeds in each mericarp)	Seed aril: 0 - absent, 1 - present	Seed color: 0 - yellow-brown, 1 - brown, 2 - red, 3 - black or reddish-black, 4 - bicoloured (rose and white)	Seed shape: 0 - ovate, 1 - depressed roundish, 2 - kidney-shaped (reniform), 3 - D-shaped; 4 - pear-shaped, 5 - sphaerical (in outgroups)	Seed size - non-coded	Seed size (coded): 0 - very small (0.3-0.7 mm); 1 - small (0.8-1.1 mm); 2 - medium-sized (1.2-1.7 mm); 3- large (from 1.8 mm)	Seed keel: 0 - absent, 1 - present	Seed notch: 0 - not present or small, 1 - well-visible reaching 1/3-1/2 of the seed diameter	Longitudinal ridges on the seed: 0 - absent, 1 - present on the seed surface, 2 - present in seed margin along the cotyledon	Surface ultrasculpture of the seed: 0 - smooth, 1 - rugose, 2 - colliculate (at least in some seed parts), 3 - mamillate, 4 - cristate; 5 - finger-like	Puzzle-like borders of cells: 0 - absent or not seen, 1 - present	Surface of testa cells: 0 – not foveolate; 1 – foveolate (with small pits)	Waxes: 0 - absent or obscure, 1 - present	Shape of wax deposits: 0 - flakes; 1 - finger-like, 2 - crystals, 3 - not applicable due to absence of waxes	Perisperm: 0 - absent, 1 - present	Embryo shape: 0 - annular, 1 - straight to r-shaped, 2 - bent	Minimum thickness of the seed coat	Maximum thickness of seed-coat testa (if colliculae or finger-like outgrowths are present)	Thickness of the seed-coat testa: 0 - very thin (up to 20 mkm), 1 - medium (20-40 mkm), 2 - thick (more than 40 mkm)	Seed-coat testa: 0, without stalactites; 1, with dark stalactites	Taxa that have white fortifications in outer cell walls (stalactite-like substances)
